# Supplementary material for: Food for Pollinators: Quantifying the Nectar and Pollen Resources of Urban Flower Meadows
Source: PubMed Central journal article supplement (PMC4920406; doi:10.1371/journal.pone.0158117), 2016-06-24

**Figure S3.** The relationship between laboratory assays and model-fitted values of pollen volume /floral unit. The table below shows the coefficients for the best-fit model, in which the missing anther size category (large) is the dummy variable. The plot shows the relationship between lab-measured and modelled values for the test data (red, n = 59) and the validation data (blue, n = 43). The fitted line shows  $x=y$ , to which both datasets show a good fit.

lm model specification for the test data:

$\log_e$  pollen volume per flower  $\sim$  1/number of stamens/flower + anther.size

Coefficients:

|                      | Estimate | Std. Error | t value | p value  |
|----------------------|----------|------------|---------|----------|
| Intercept            | 2.3350   | 0.6029     | 3.873   | 0.0003   |
| 1/stamens per flower | -8.9835  | 1.9868     | -4.521  | <<0.0001 |
| anther.size medium   | -3.2777  | 0.6475     | -5.062  | <<0.0001 |
| anther.size small    | -5.5904  | 0.6617     | -8.448  | <<0.0001 |
| anther.size tiny     | -4.4862  | 0.6653     | -6.743  | <<0.0001 |

Residual standard error: 1.149 on 54 degrees of freedom

Multiple R-squared: 0.723, Adjusted R-squared: 0.7025

F-statistic: 35.23 on 4 and 54 DF, p-value <<0.0001

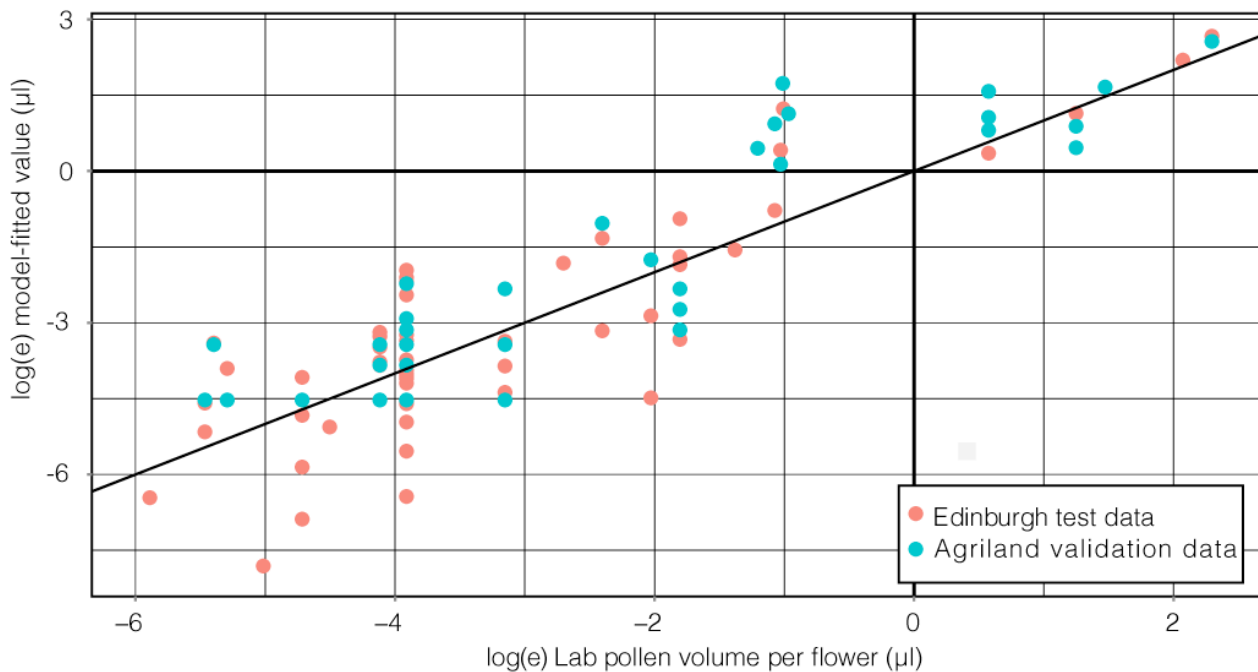

Supplement: pone.0158117.s003.pdf [file pone.0158117.s003.pdf]
