# Supplementary material for: Food for Pollinators: Quantifying the Nectar and Pollen Resources of Urban Flower Meadows
Source: PubMed Central journal article supplement (PMC4920406; doi:10.1371/journal.pone.0158117), 2016-06-24

**Figure S4.** Seasonal patterns in nectar sugar nectar sugar mass/m<sup>2</sup>/day for each site in (a) Bristol, (b) Leeds, and (c) Reading. Point values shown are means over 7x 1m<sup>2</sup> quadrats, with 95% confidence intervals shaded.

(a) Bristol: Perennial

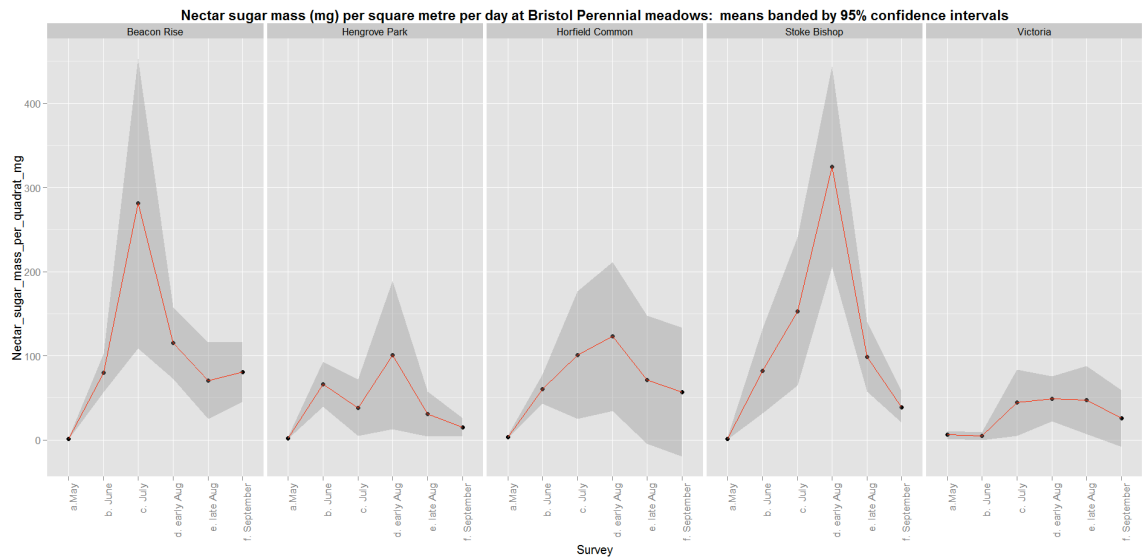

Annual A1

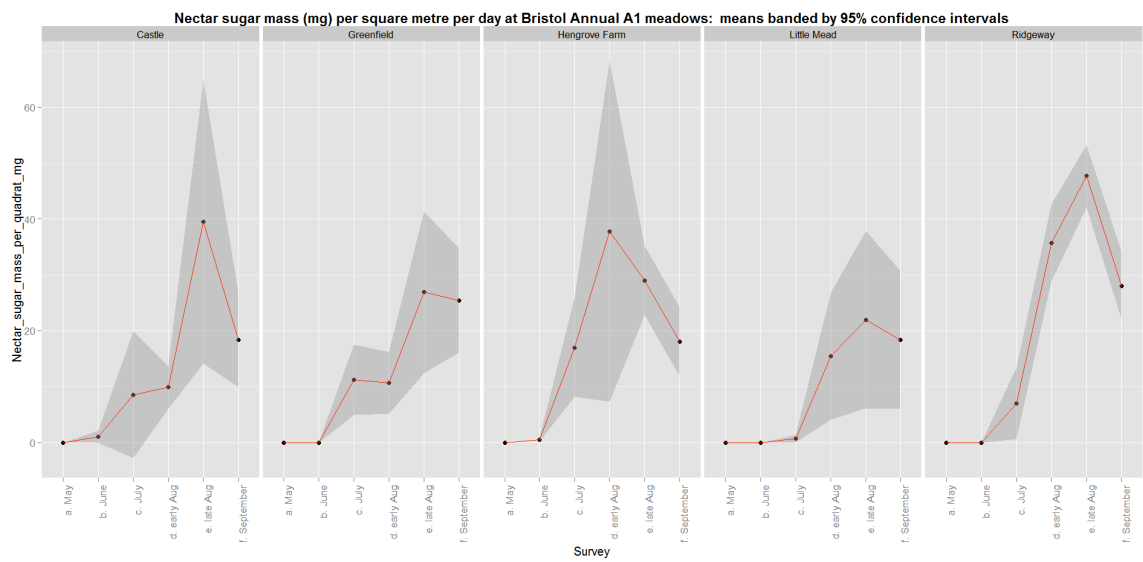

Annual A2

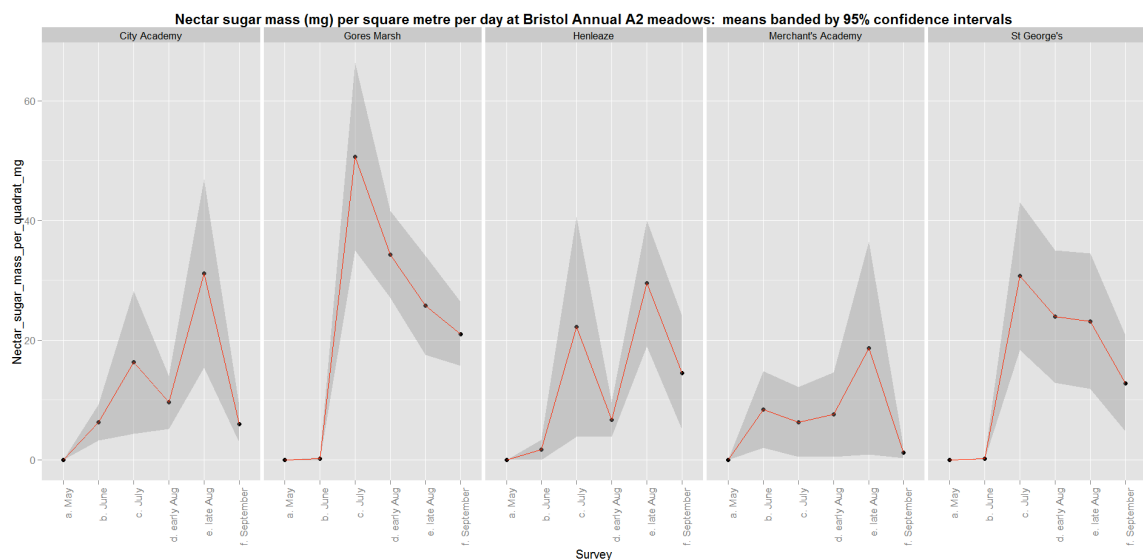

**Figure S4 (continued).** Seasonal patterns in nectar sugar mass/m<sup>2</sup>/day for each site  
 (b) Leeds: Perennial

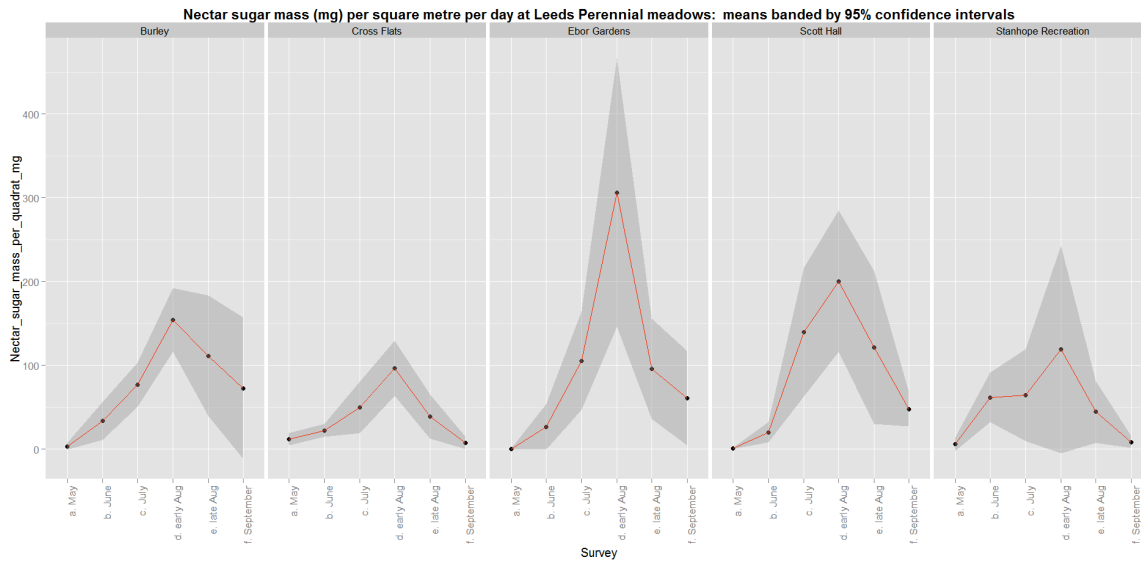

**Annual A1**

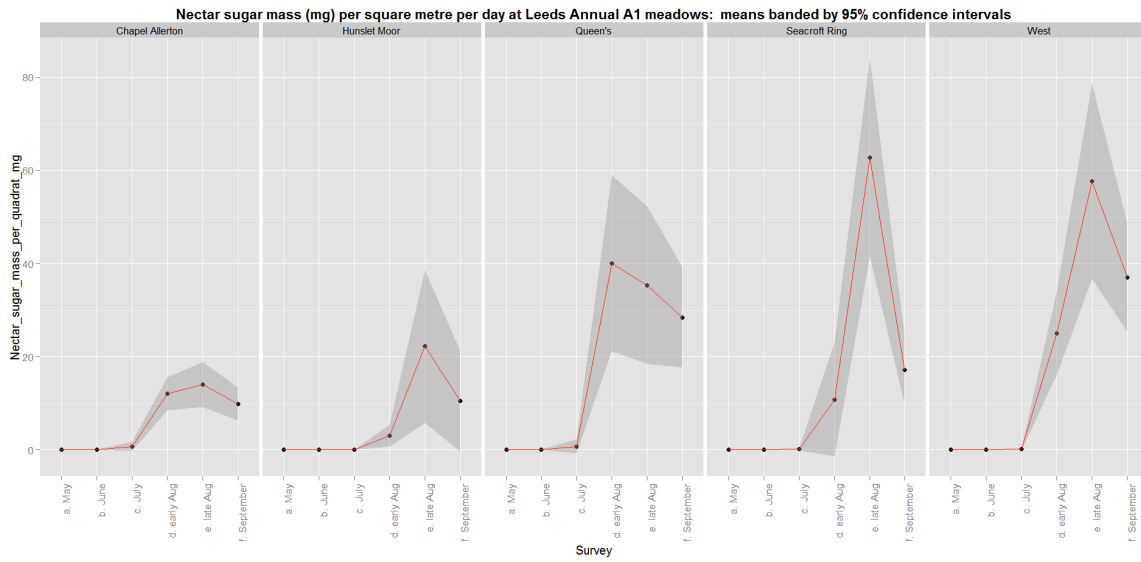

**Annual A2**

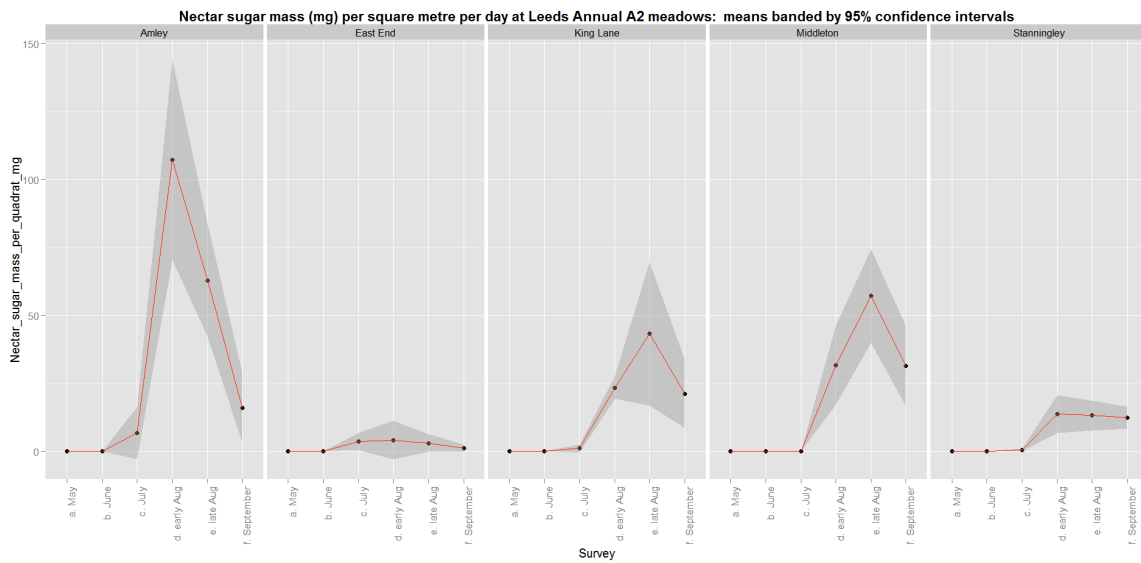

**Figure S4 (continued).** Seasonal patterns in nectar sugar mass/m<sup>2</sup>/day for each site  
 (c) Reading: Perennial

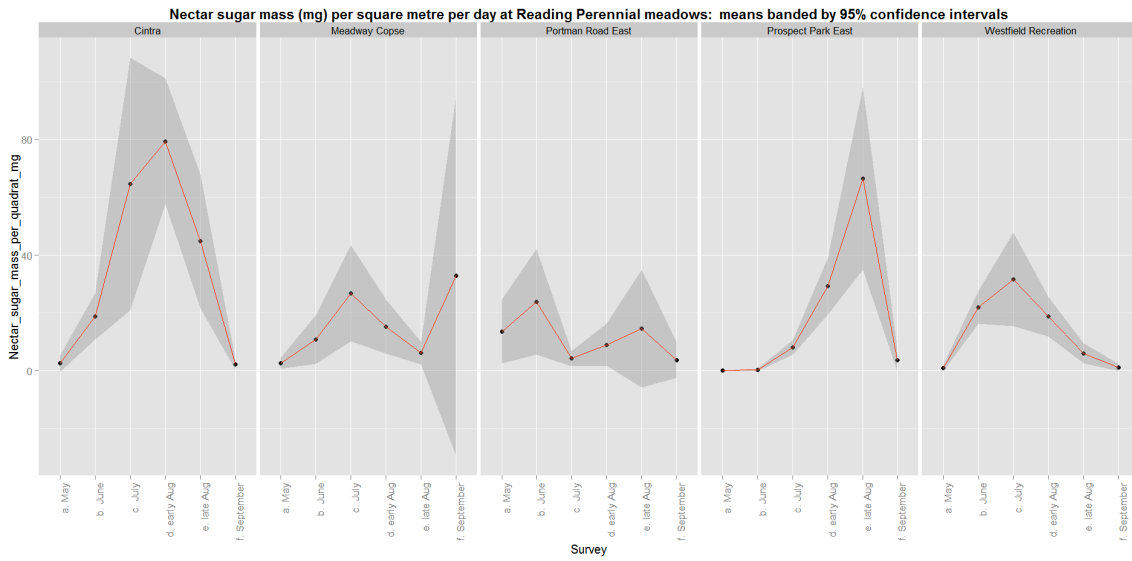

**Annual A1**

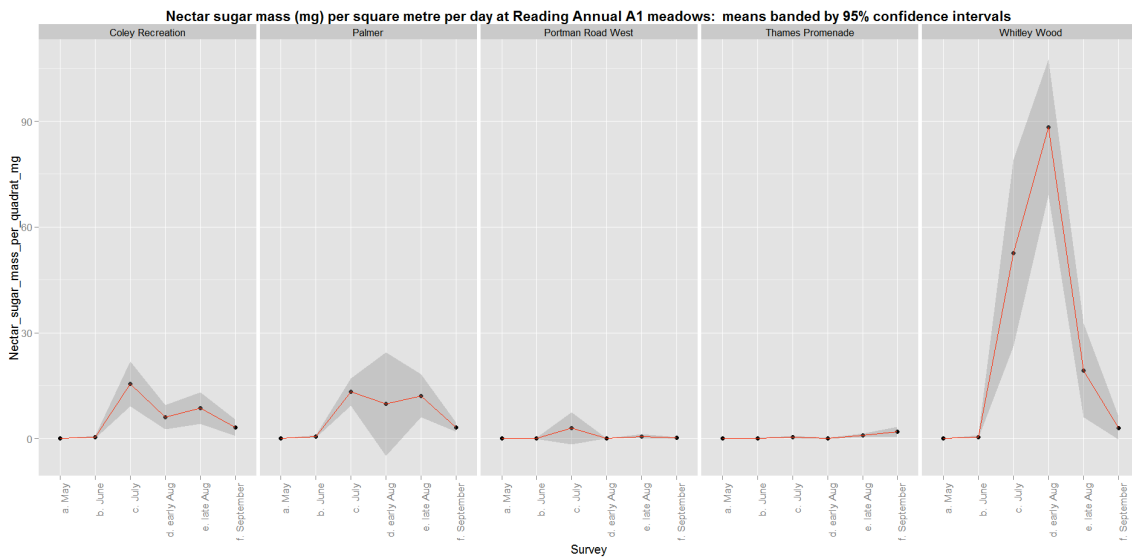

**Annual A2**

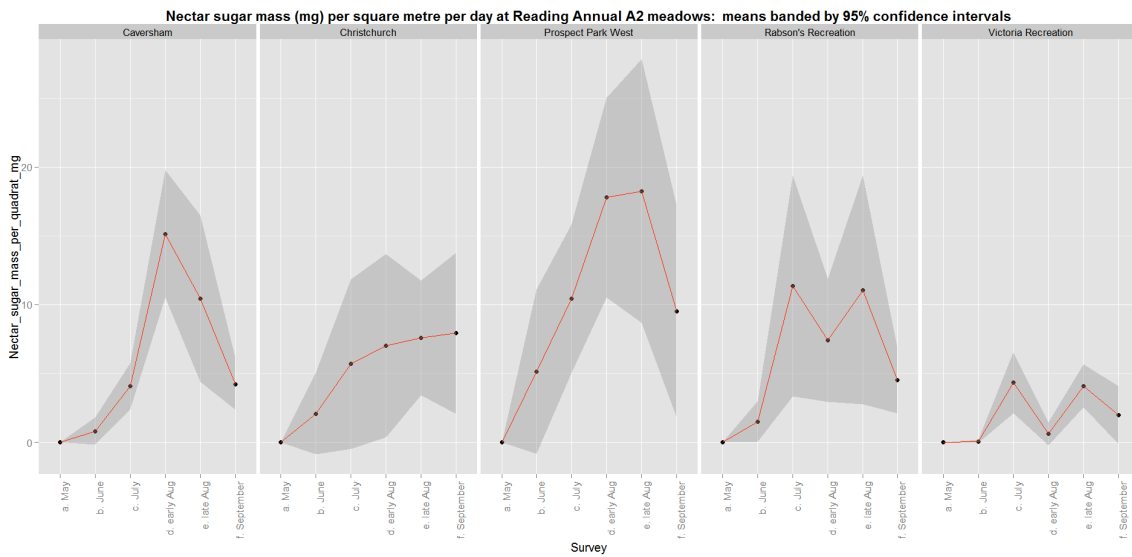

Supplement: pone.0158117.s004.pdf [file pone.0158117.s004.pdf]
