# Supplementary material for: Food for Pollinators: Quantifying the Nectar and Pollen Resources of Urban Flower Meadows
Source: PubMed Central journal article supplement (PMC4920406; doi:10.1371/journal.pone.0158117), 2016-06-24

**Figure S5.** Seasonal patterns in pollen volume per m<sup>2</sup>/day for each site in (a) Bristol, (b) Leeds, and (c) Reading. Point values shown are means over 7x 1m<sup>2</sup> quadrats, with 95% confidence intervals shaded.

(a) Bristol: Perennial

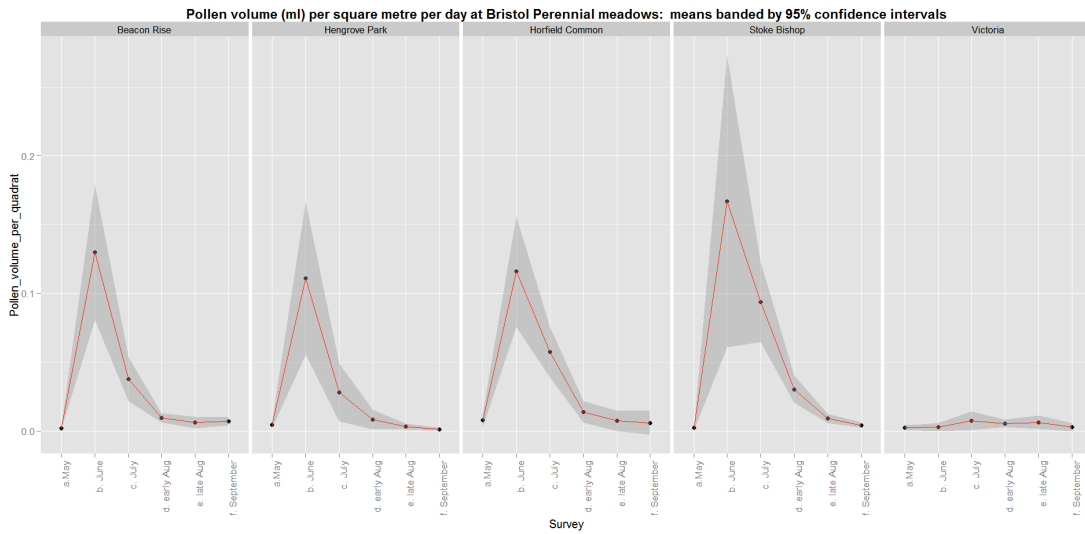

Annual A1

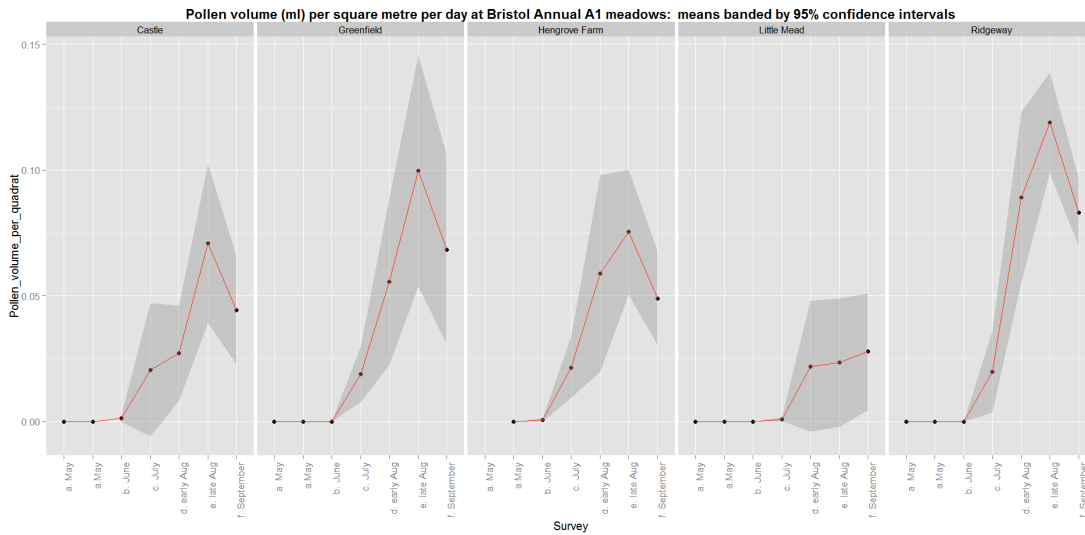

Annual A2

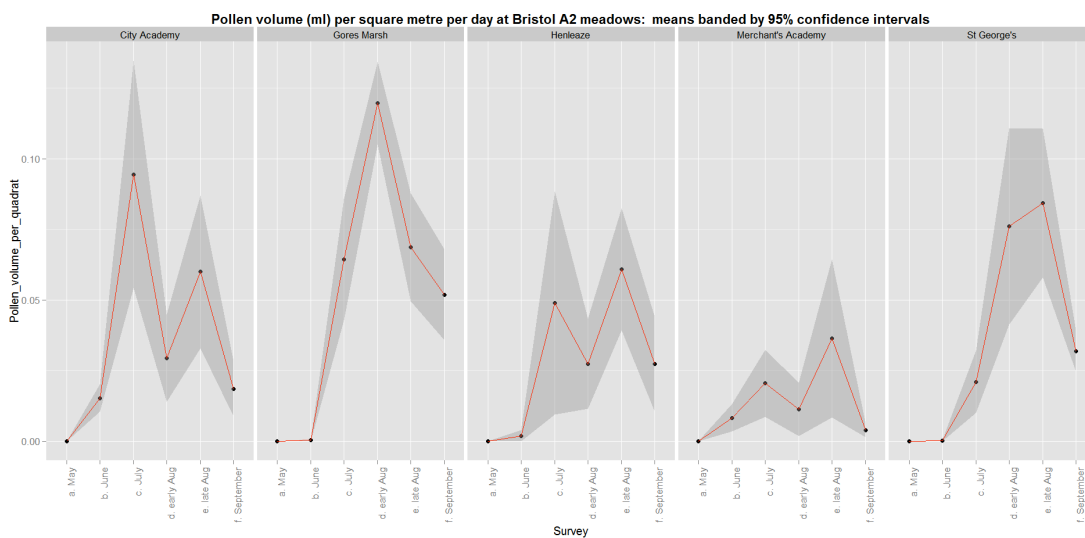

**Figure S5** (continued). Seasonal patterns in pollen volume per m<sup>2</sup>/day for each site.  
**(b) Leeds**  
**Perennial**

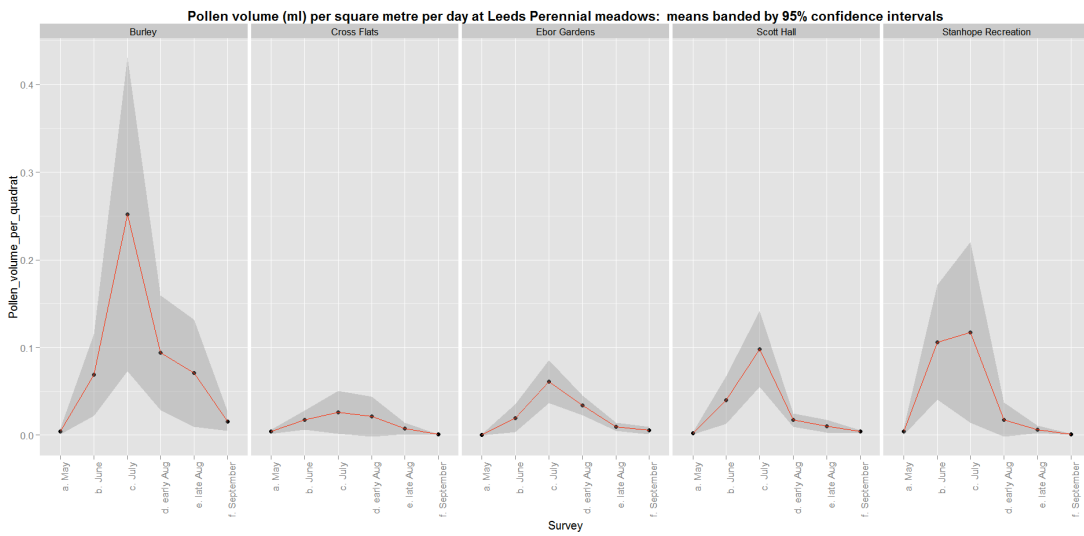

**Annual A1**

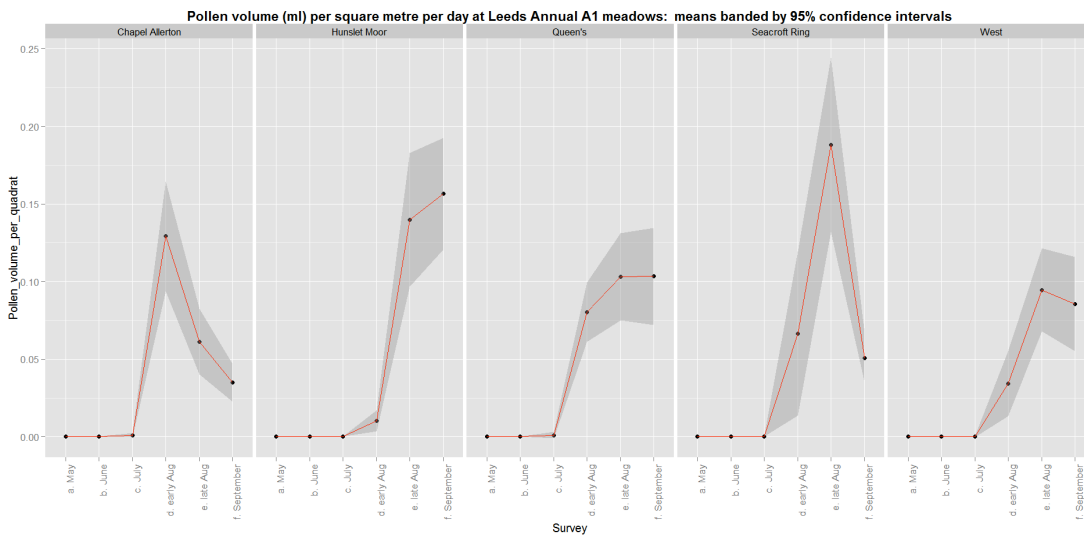

**Annual A2**

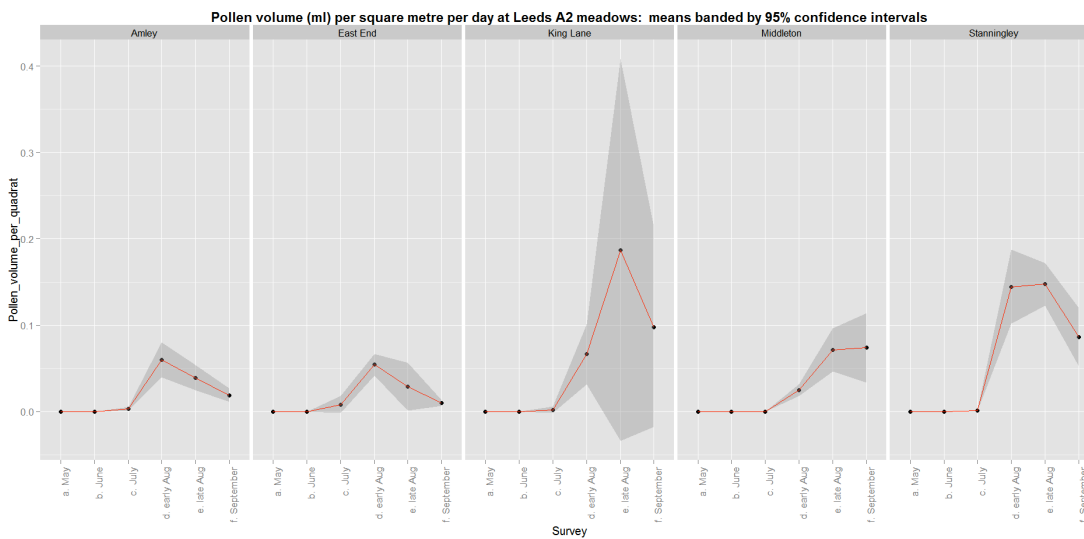

**Figure S5** (continued). Seasonal patterns in pollen volume per m<sup>2</sup>/day for each site. (c) Reading Perennial

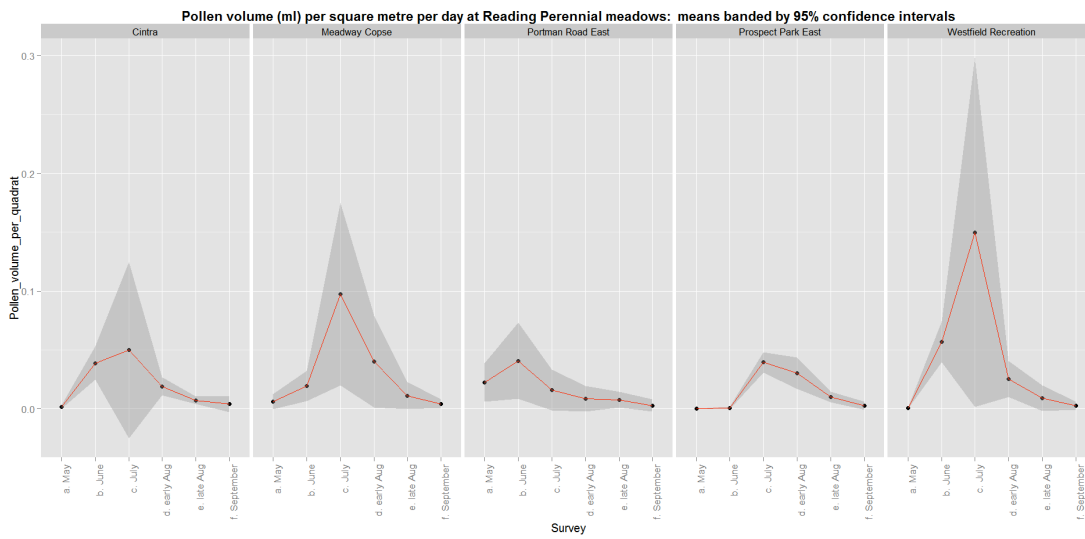

**Annual A1**

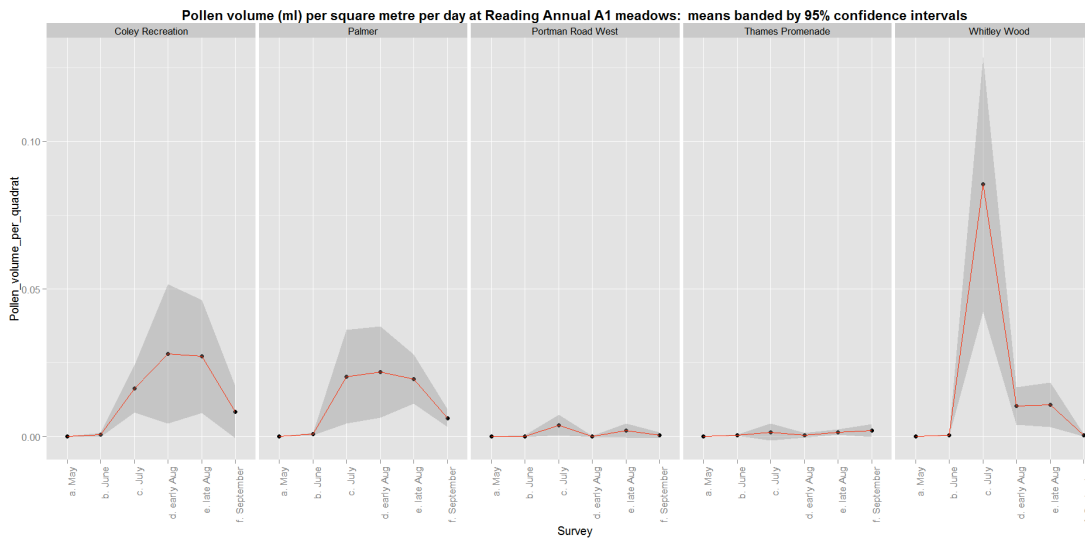

**Annual A2**

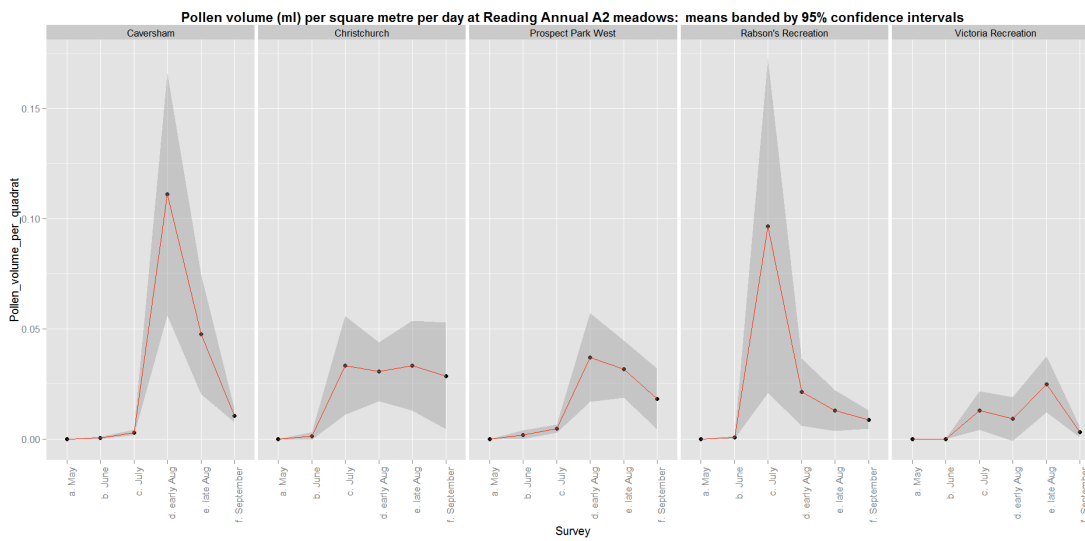

Supplement: pone.0158117.s005.pdf [file pone.0158117.s005.pdf]
